# Supplementary material for: Coelomocytes Regulate Starvation-Induced Fat Catabolism and Lifespan Extension through the Lipase LIPL-5 in Caenorhabditis elegans
Source: PubMed Central journal article supplement — Cell Rep. 2019 Jul 23;28(4):1041–1049.e4. doi: 10.1016/j.celrep.2019.06.064 (PMC6667774; doi:10.1016/j.celrep.2019.06.064), 2019-07-23
Supplement: mmc1.pdf [file mmc1.pdf]

Cell Reports, Volume 28

## Supplemental Information

### **Coelomocytes Regulate Starvation-Induced Fat Catabolism and Lifespan Extension through the Lipase LIPL-5 in *Caenorhabditis elegans***

**Alexia Buis, Stéphanie Bellemin, Jérôme Goudeau, Léa Monnier, Nicolas Loiseau, Hervé Guillou, and Hugo Aguilaniu**

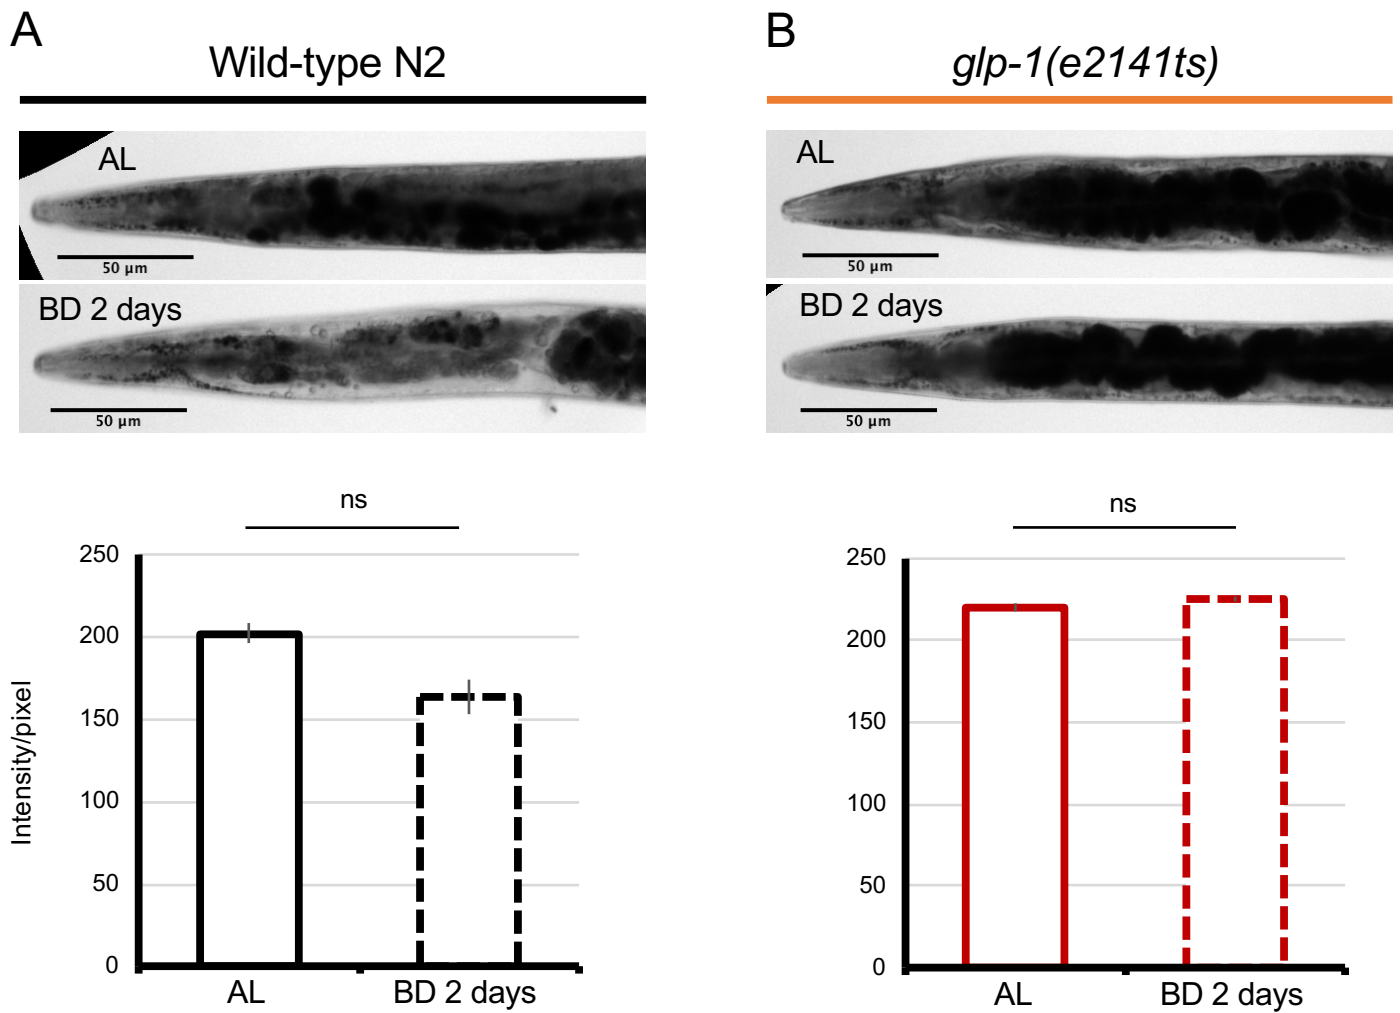

**Figure S1. Sudan Black Staining of Lipids in Fed and Starved *C. elegans*.**

**Relates to Figure 1**

(A and B) Sudan Black staining of representative whole animals (upper panels) and densitometric quantification of staining of the two first cells of the intestine after background removal (lower panels) in wild-type *C. elegans* and *glp-1(e2141ts)* mutants fed *ad libitum* (AL) or subjected to bacterial deprivation (BD) for 2 days. Mean ± SD of n 6. ns, not significant by two-tailed Mann-Whitney U test. Representative of 3 biological replicates.

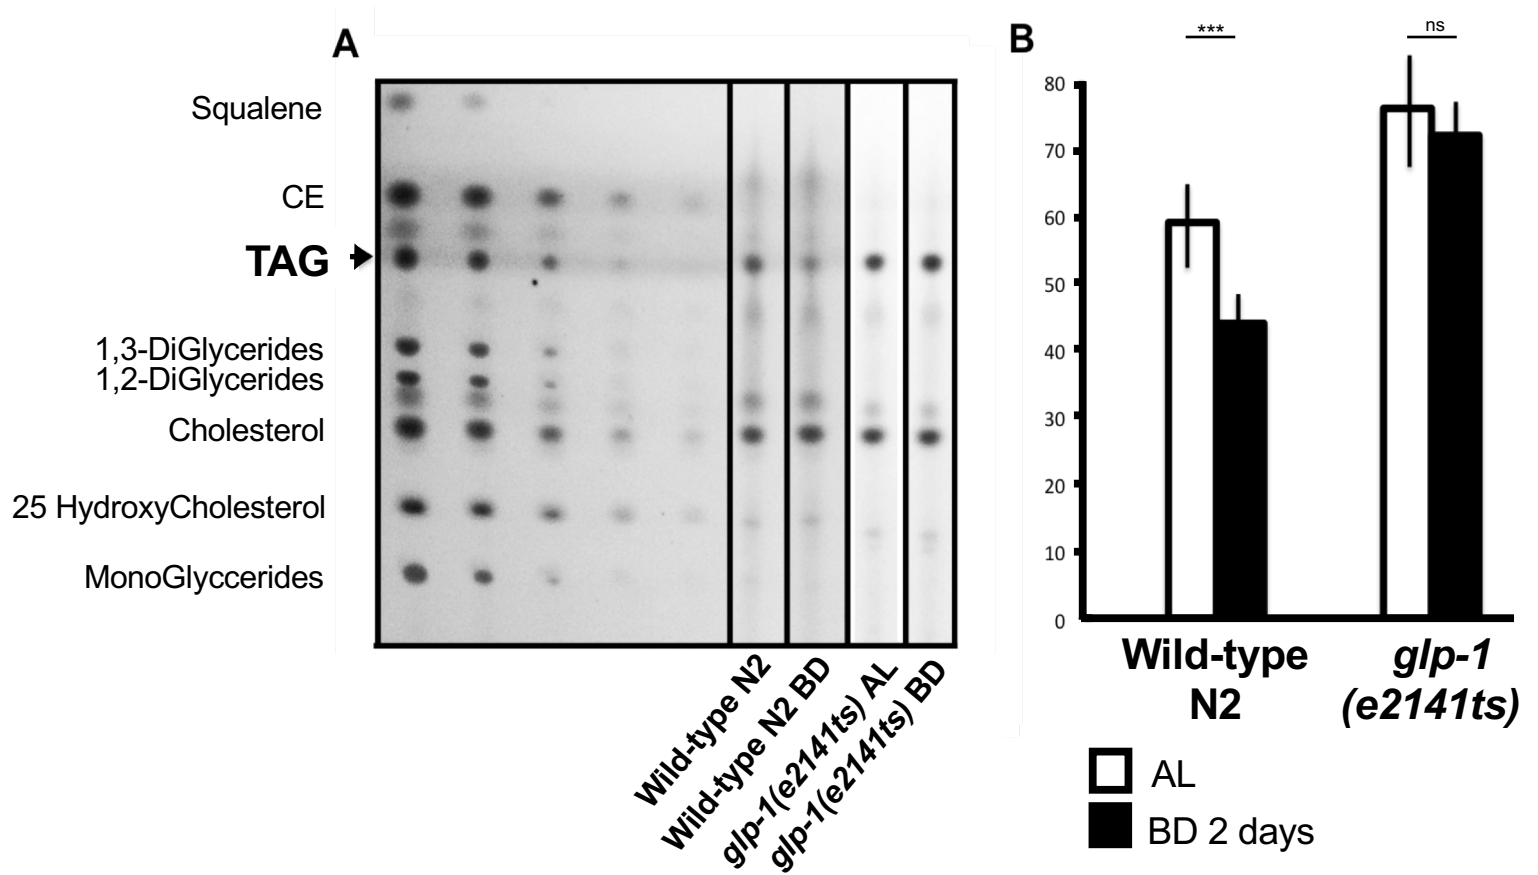

**Figure S2. Thin Layer Chromatography of Lipids in Fed and Starved *C. elegans*.**

**Relates to Figure 1**

(A) Thin layer chromatography of triacylglycerol (TAG) in wild-type N2 fed *ad libitum* (AL) or subjected to bacterial deprivation (BD) for 2

days. (B) Quantification of TG levels. Mean  $\pm$  SD of  $n =$  at least 6. ns, not significant; \*\*\*  $p < 0.001$  by two-tailed Student's t-test.

Representative of 2 biological replicates.

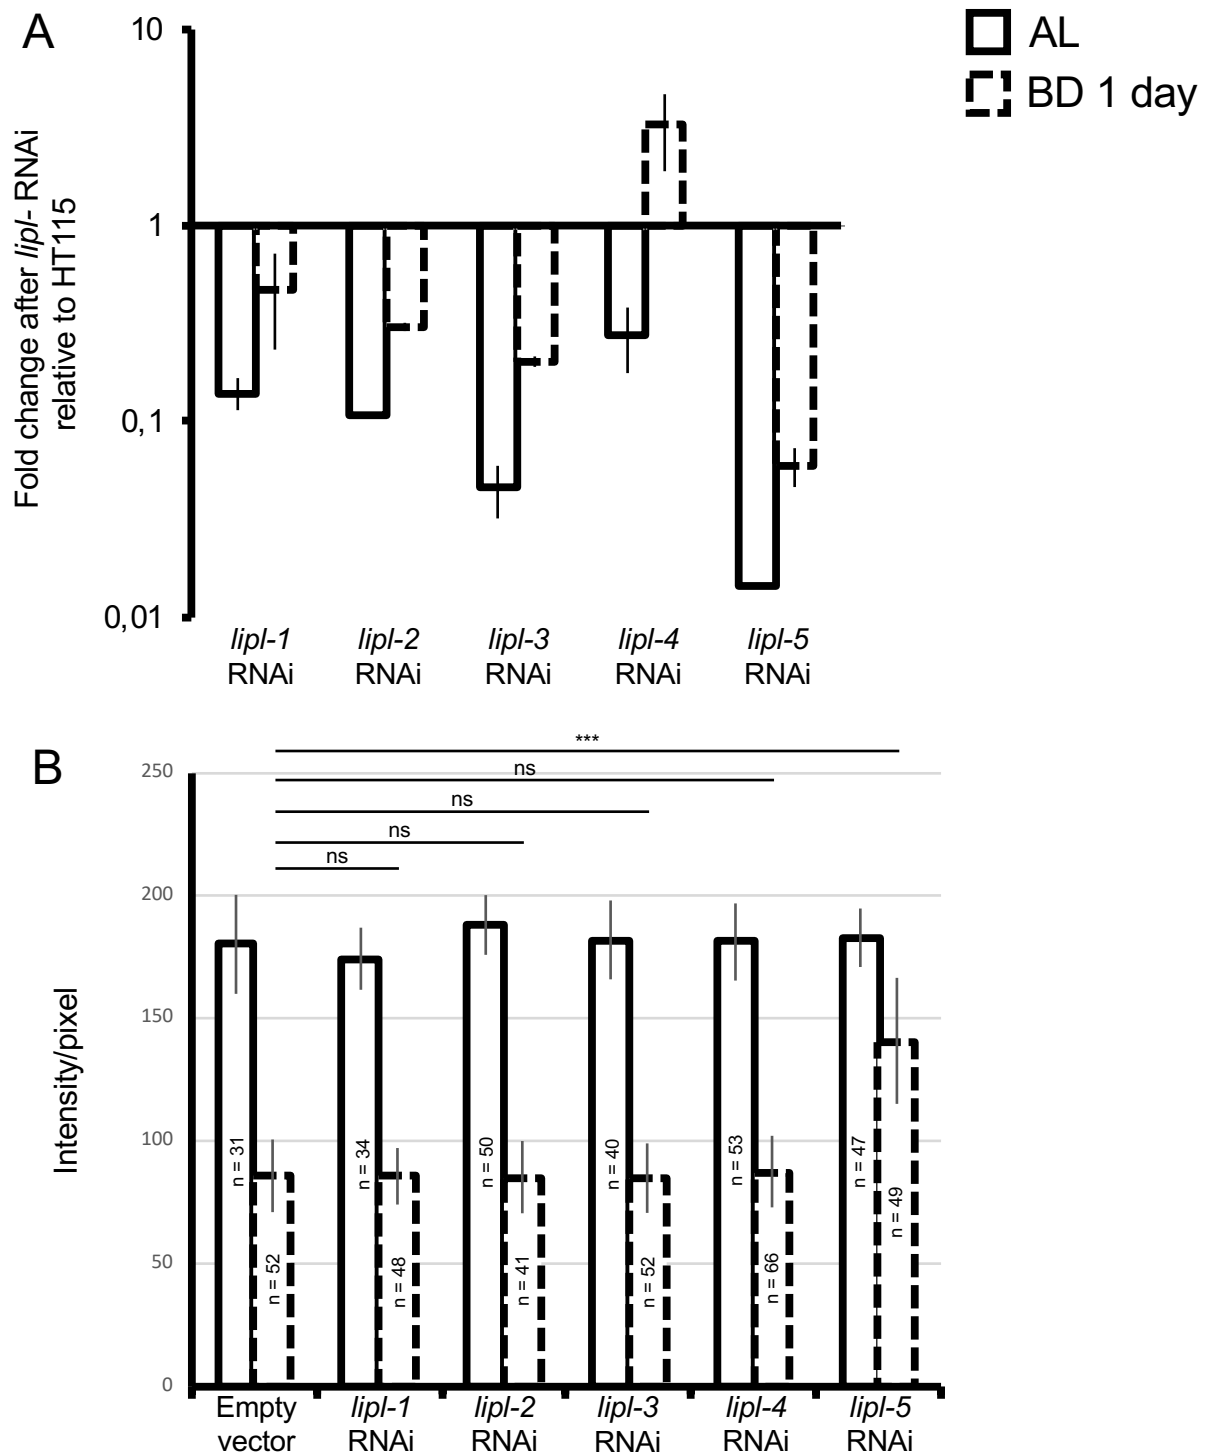

**Figure S3. *lip1-5* RNAi Efficiency and Effect on Fat Catabolism in Fed and Starved *C. elegans***

**Relates to Figure 1**

(A) RT-qPCR analysis of *lip1-1*, *lip1-2*, *lip1-3*, *lip1-4*, and *lip1-5* mRNA in wild-type *C. elegans* subjected to RNAi and fed *ad libitum* (AL, solid bars) or subjected to bacterial deprivation (BD, dashed bars) for 1 day. Results are normalized to mRNA levels in animals fed bacteria transfected with empty vector. Representative of 3 biological replicates. The relatively inefficiency of *lip1-4* RNAi after 1 day of BD is likely due to the particularly strong induction of this lipase by BD. Note, however, that this isoform has little effect on TAG levels under these conditions (O'Rourke et al., 2013). (B) Densitometric quantification of Oil Red O staining of fat stores of the two first intestinal cells after background removal in wild-type *C. elegans* subjected to *lip1-1*, -2, -3, -4, or -5 RNAi and fed AL (solid bars) or subjected to BD (dashed bars) for 1 day. Mean  $\pm$  SD of n = at least 20 worms ns, not significant; \*\*\*p < 0.001 by two-tailed Mann-Whitney U test. Representative of 3 biological replicates.

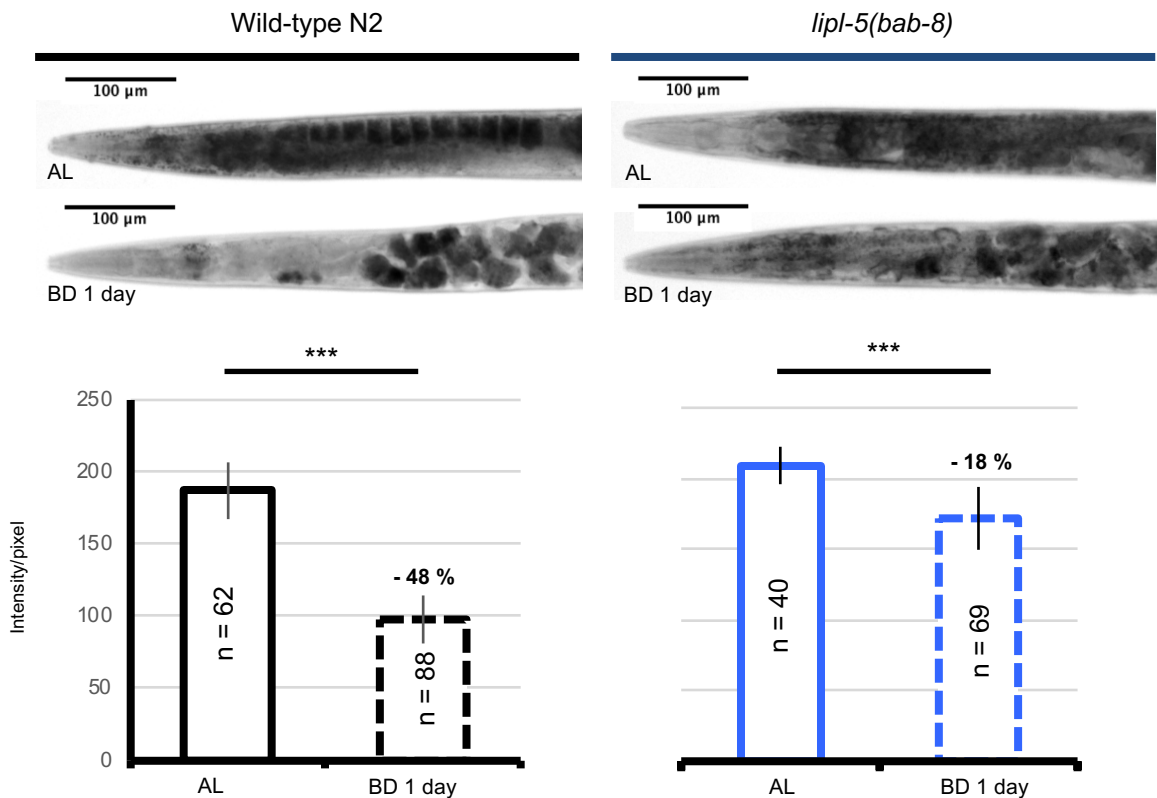

**Figure S4. A Second *lipI-5* Mutation Confirms that Suppression of LIPL-5 Activity Mediates the Reduction in Fat Catabolism and Enhancement in Longevity Induced by Bacterial Deprivation**

**Relates to Figure 2**

Light micrographs of representative Oil Red O (ORO)-stained whole animals (upper panels) and densitometric quantification of staining of the two first intestinal cells after background removal (lower panels) for wild-type *C. elegans* and *lipI-5(bab-8)* CRISPR-generate mutants fed *ad libitum* (AL) or subjected to bacterial deprivation (BD) for 1 day. Mean  $\pm$  SD of  $n = 20$ . \*\*\* $P < 0.001$  by two-tailed Mann-Whitney U test. Representative of 5 biological replicates.

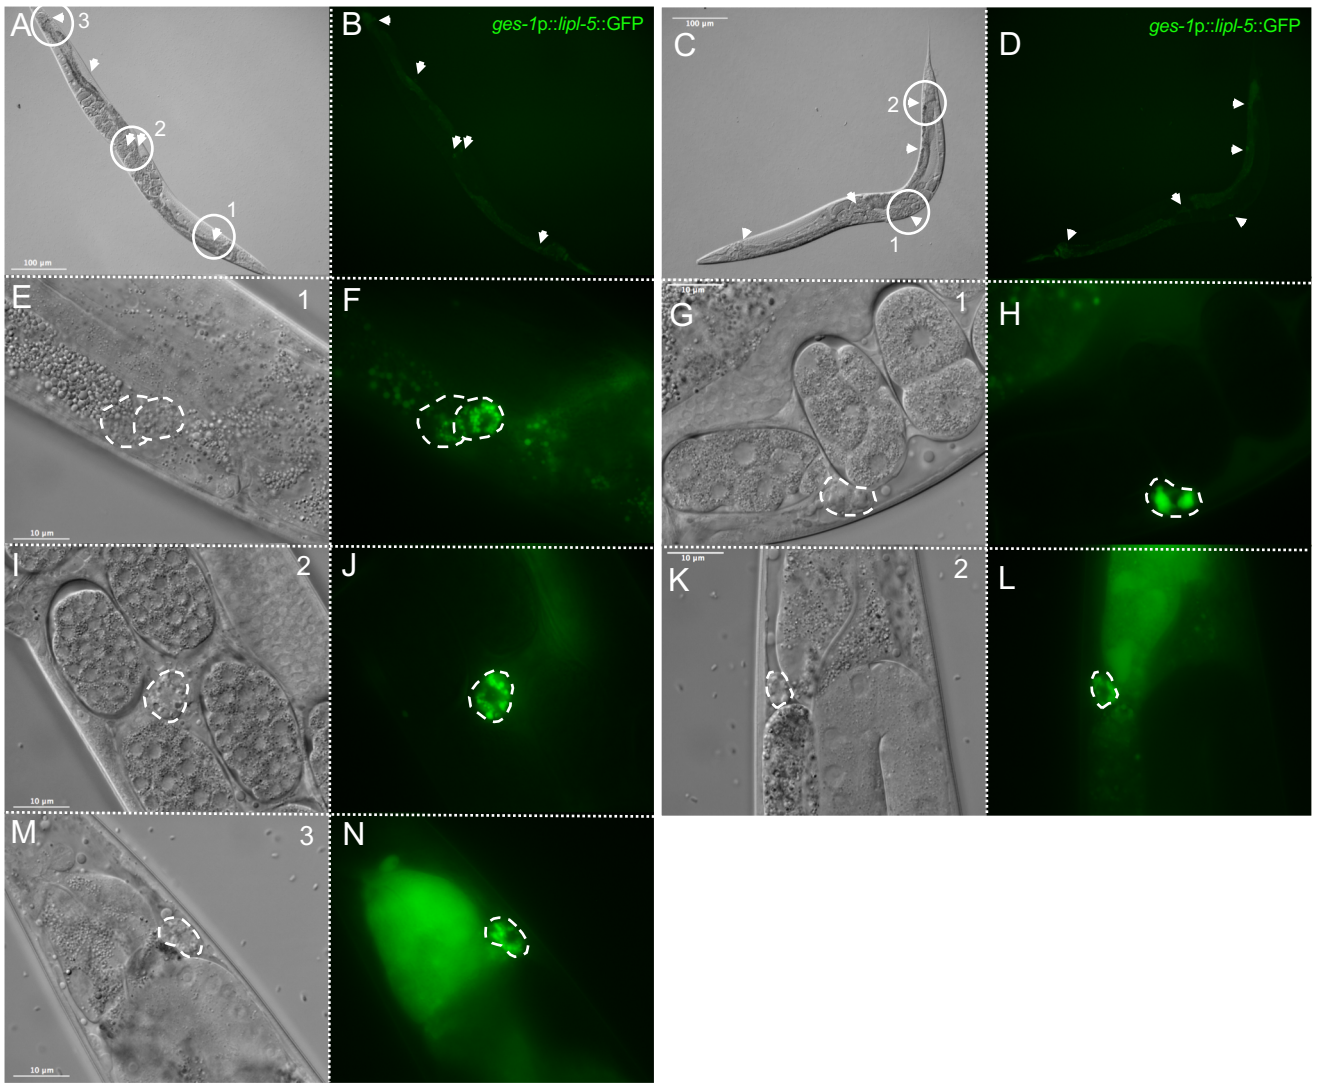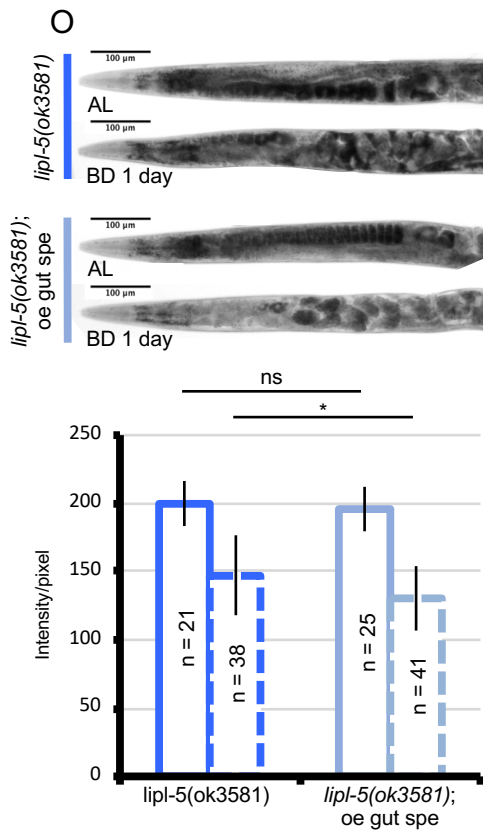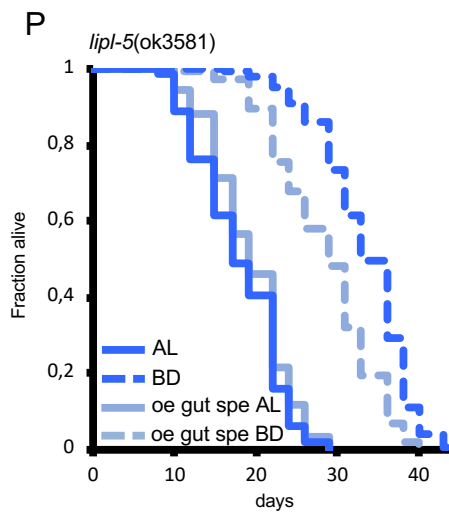

**Figure S5. Gut-specific *lipl-5* Overexpression in *lipl-5(ok358)* Mutants Partially Reverses the Reduced Fat Catabolism and Enhanced Lifespan Extension Induced by Bacterial Deprivation.**

**Relates to Figure 2**

(A, C, E, G, I, K, M) DIC images and (B, D, F, H, J, L, N) fluorescence images of *lipl-5(ok358)* mutants overexpressing LIPL-5::GFP in the gut (*ges-1* promoter). The A, C, E, G, I, K and M panels and right 6 panels show two adult animals at low magnification (A, B, C and D) and high magnification (E, F, G H, I, J, K, L, M, N); scale bars, 100  $\mu\text{m}$  and 10  $\mu\text{m}$ , respectively). White arrows and dotted lines indicate coelomocytes. Each experiment was replicated at least 3 times (biological replicates). (O) Light micrographs of representative Oil Red O (ORO)-stained whole animals (upper panels) and densitometric quantification of staining of the two first intestinal cells after background removal (lower panel) for *lipl-5(ok358)* mutants with or without gut specific (*ges-1*-driven) *lipl-5* overexpression. Animals were fed ad libitum (AL) or subjected to bacterial deprivation (BD) for 1 day. Mean  $\pm$  SD of n = at least 20 worms ns, not significant; \*\* p < 0.001 by two-tailed Mann-Whitney U test. Representative of 3 biological replicates. (P) Lifespan analyses of *C. elegans* fed AL or subjected to BD. BD extended lifespan by 85% for *lipl-5(ok3581)* mutant (P < 0.0001) and by 48% for *lipl-5(ok3581)* mutants over-expressing *lipl-5* specifically in the intestine (P < 0.0001). When fed ad libitum, the latter strain exhibits a 7% increase when compared to *lipl-5(ok3581)* mutant animals (P < 0.05). In BD, *lipl-5(ok3581)* mutants over-expressing *lipl-5* specifically in the intestine live 14% shorter than simple *lipl-5(ok3581)* mutant animals (P < 0.001). Mantel-Cox log-rank test and the two-tailed Student's t-test. Representative of 3 replicate experiments (See table S2 for number of replicates).

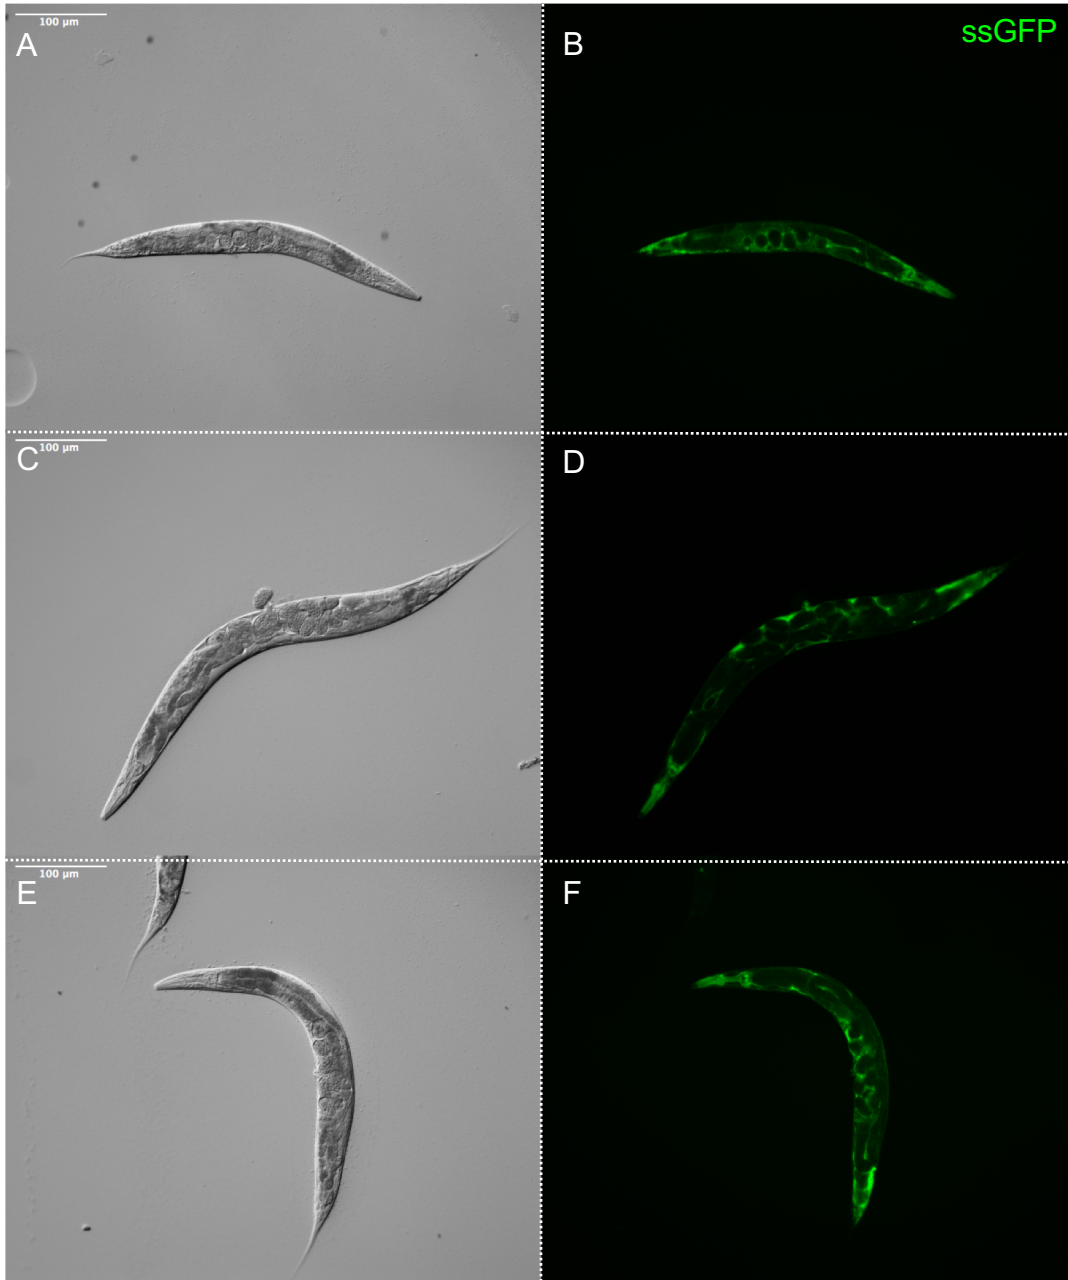

**Figure S6. Coelomocyte-Deficient Animals Exhibit a Cup Phenotype.**

**Relates to Figure 5**

(A, C, E) DIC images and (B, C, F) fluorescence images of adult coelomocyte-deficient animals (coel.-) expressing a soluble form of GFP secreted from body wall muscle cells. In wild-type *C. elegans*, GFP secreted into the pseudocoelom is taken up by coelomocytes; in coel.- animals, worms imaged, GFP accumulates in the pseudocoelom (coelomocyte uptake [cup] phenotype).



| Genotype                            | Origin               | Strain number |
|-------------------------------------|----------------------|---------------|
| <i>glp-1(e2141ts)III</i>            | Gift from Kenyon Lab | CF1903        |
| <i>daf-2(e1370)III</i>              | CGC                  | CB1370        |
| <i>lipl-5(ok3581)V</i>              | CGC                  | RB2573        |
| <i>lynEx03**</i>                    | UMS3421              | MCP39         |
| <i>lipl-5(ok3581)V;lynEx03</i>      | Our lab              | HGA2912       |
| <i>unc-119(ed3)III;pwls50***</i>    | CGC                  | RT258         |
| <i>lipl-5::td-tomato</i>            | UMS3421              | MCP34         |
| <i>lipl-5::td-tomato;pwls50</i>     | Our lab              | HGA2914       |
| <i>coel.(-)</i>                     | Gift from Fares Lab  | NP717         |
| <i>coel.(-);lipl-5(ok3581)V</i>     | Our lab              | HGA2915       |
| <i>coel.(-);lynEx03</i>             | Our lab              | HGA2916       |
| <i>lipl-5(ok3581)V;lynEx04****</i>  | Our lab              | HGA2917       |
| <i>lipl-5(bab-8)V</i>               | UMS3421              | MCP12         |
| <i>lipl-5(ok3581)V;lynEx02*****</i> | Our lab              | HGA8021       |

\* CGC = Caenorhabditis Genetics Center

\*\*lynEx03 = [(pAB02(*lipl-5p::lipl-5::td-tomato*) and co-injection marker *myo-2p::mCherry*]

\*\*\*pwls50 = [*lmp-1::GFP* + *Cbr-unc-119(+)*]

\*\*\*\*lynEx04 = [(pAB02(*pcc1::lipl-5::td-tomato*) and co-injection marker *myo-2p::mCherry*]

\*\*\*\*\*bls1 = [*vit-2::GFP* + *rol-6(su1006)*]

\*\*\*\*\*lynEx02 = [(pAB01(*ges-1p::lipl-5::gfp*) and co-injection marker *myo-2p::mCherry*]

Table S1: Strain list, Related to all figures

| Genotype | Condition | Mean LS | ± | # Worms | % Change | P value |
|----------|-----------|---------|---|---------|----------|---------|
|----------|-----------|---------|---|---------|----------|---------|

|            |                     |           |               |              |                |              |                    |
|------------|---------------------|-----------|---------------|--------------|----------------|--------------|--------------------|
| Figure 1 A | Wild-type N2        | AL        | 16,372        | 0,411        | 194/201        | 62,98        | < 0.0001           |
|            |                     | BD        | 26,683        | 0,558        | 188/194        |              |                    |
|            | Wild-type N2        | AL        | 17,703        | 0,621        | 132/139        | 31,78        | < 0.0001           |
|            |                     | BD        | 23,329        | 0,500        | 146/190        |              |                    |
|            | <b>Wild-type N2</b> | <b>AL</b> | <b>15,881</b> | <b>0,396</b> | <b>190/198</b> | <b>57,64</b> | <b>&lt; 0.0001</b> |
|            |                     | <b>BD</b> | <b>25,035</b> | <b>0,446</b> | <b>144/176</b> |              |                    |

|                                                        |                                                               |               |               |                |                |              |                    |
|--------------------------------------------------------|---------------------------------------------------------------|---------------|---------------|----------------|----------------|--------------|--------------------|
| Figure 4 A                                             | <b>Wild-type N2</b>                                           | <b>AL</b>     | <b>18,495</b> | <b>0,318</b>   | <b>233/239</b> | <b>56,42</b> | <b>&lt; 0.0001</b> |
|                                                        |                                                               | <b>BD</b>     | <b>28,930</b> | <b>0,401</b>   | <b>228/239</b> |              |                    |
|                                                        | Wild-type N2                                                  | AL            | 17,638        | 0,527          | 118/126        | 41,84        | < 0.0001           |
|                                                        |                                                               | BD            | 25,017        | 0,569          | 95/116         |              |                    |
|                                                        | Wild-type N2                                                  | AL            | 20,150        | 0,600          | 120/124        | 47,59        | < 0.0001           |
|                                                        |                                                               | BD            | 29,740        | 0,640          | 100/129        |              |                    |
|                                                        | <i>lipI-5(ok3581)</i>                                         | AL            | 16,959        | 0,408          | 122/123        | 98,53        | < 0.0001           |
|                                                        |                                                               | BD            | 33,668        | 0,396          | 131/142        |              |                    |
|                                                        | <b><i>lipI-5(ok3581)</i></b>                                  | <b>AL</b>     | <b>18,162</b> | <b>0,474</b>   | <b>122/124</b> | <b>85,57</b> | <b>&lt; 0.0001</b> |
|                                                        |                                                               | <b>BD</b>     | <b>33,703</b> | <b>0,476</b>   | <b>99/146</b>  |              |                    |
|                                                        | <i>lipI-5(ok3581)</i>                                         | AL            | 16,929        | 0,278          | 267/284        | 79,10        | < 0.0001           |
|                                                        |                                                               | BD            | 30,320        | 0,398          | 157/171        |              |                    |
|                                                        | Wild-type N2                                                  | AL            | <b>18,495</b> | <b>0,318</b>   | <b>233/239</b> | -1,80        | 0.515              |
|                                                        | <i>lipI-5(ok3581)</i>                                         |               | <b>18,162</b> | <b>0,474</b>   | <b>122/124</b> |              |                    |
| Wild-type N2                                           | BD                                                            | <b>28,930</b> | <b>0,401</b>  | <b>228/239</b> | 16,50          | P < 0.001    |                    |
| <i>lipI-5(ok3581)</i>                                  |                                                               | <b>33,703</b> | <b>0,476</b>  | <b>99/146</b>  |                |              |                    |
| Figure 4 B                                             | <i>lipI-5(ok3581)</i>                                         | AL            | 18,653        | 0,492          | 98/103         | 85,20        | < 0.0001           |
|                                                        |                                                               | BD            | 34,546        | 0,428          | 86/146         |              |                    |
|                                                        | <i>lipI-5(ok3581)</i>                                         | AL            | 18,653        | 0,492          | 98/103         | 85,20        | < 0.0001           |
|                                                        |                                                               | BD            | 34,546        | 0,428          | 86/146         |              |                    |
|                                                        | <b><i>lipI-5(ok3581)</i></b>                                  | <b>AL</b>     | <b>18,160</b> | <b>0,510</b>   | <b>111/141</b> | <b>72,25</b> | <b>&lt; 0.0001</b> |
|                                                        |                                                               | <b>BD</b>     | <b>31,280</b> | <b>0,770</b>   | <b>67/109</b>  |              |                    |
|                                                        | <i>lipI-5(ok3581); oe lipI-5 (endogenous promoter)</i>        | AL            | 18,178        | 0,361          | 189/193        | 64,10        | < 0.0001           |
|                                                        |                                                               | BD            | 29,830        | 0,455          | 126/144        |              |                    |
|                                                        | <b><i>lipI-5(ok3581); oe lipI-5 (endogenous promoter)</i></b> | <b>AL</b>     | <b>18,410</b> | <b>0,400</b>   | <b>136/141</b> | <b>50,03</b> | <b>&lt; 0.0001</b> |
|                                                        |                                                               | <b>BD</b>     | <b>27,620</b> | <b>0,610</b>   | <b>99/116</b>  |              |                    |
|                                                        | <i>lipI-5(ok3581); oe lipI-5 (endogenous promoter)</i>        | AL            | 18,178        | 0,361          | 189/193        | 64,10        | < 0.0001           |
|                                                        |                                                               | BD            | 29,830        | 0,455          | 126/144        |              |                    |
|                                                        | <i>lipI-5(ok3581)</i>                                         | AL            | <b>18,160</b> | <b>0,510</b>   | <b>111/141</b> | 1,38         | 0.651              |
|                                                        | <i>lipI-5(ok3581); oe lipI-5 (endogenous promoter)</i>        |               | <b>18,410</b> | <b>0,400</b>   | <b>136/141</b> |              |                    |
| <i>lipI-5(ok3581)</i>                                  | BD                                                            | <b>31,280</b> | <b>0,770</b>  | <b>67/109</b>  | -11,70         | P < 0.001    |                    |
| <i>lipI-5(ok3581); oe lipI-5 (endogenous promoter)</i> |                                                               | <b>27,620</b> | <b>0,610</b>  | <b>99/116</b>  |                |              |                    |

|              |              |        |        |         |         |         |          |
|--------------|--------------|--------|--------|---------|---------|---------|----------|
| Figure 6A    | Wild-type N2 | AL     | 17,638 | 0,527   | 118/126 | 41,84   | < 0.0001 |
|              |              | BD     | 25,017 | 0,569   | 95/116  |         |          |
|              | coel.(-)     | AL     | 14,815 | 0,440   | 107/110 | 89,44   | < 0.0001 |
|              |              | BD     | 28,066 | 0,646   | 89/107  |         |          |
|              | coel.(-)     | AL     | 14,405 | 0,383   | 122/123 | 109,48  | < 0.0001 |
|              |              | BD     | 30,175 | 0,706   | 106/130 |         |          |
|              | coel.(-)     | AL     | 13,718 | 0,422   | 106/120 | 108,32  | < 0.0001 |
|              |              | BD     | 28,578 | 0,780   | 96/126  |         |          |
|              | coel.(-)     | AL     | 16,611 | 0,564   | 99/118  | 78,63   | < 0.0001 |
|              |              | BD     | 29,672 | 0,670   | 101/144 |         |          |
|              | coel.(-)     | AL     | 16,237 | 0,568   | 113/116 | 90,49   | < 0.0001 |
|              |              | BD     | 30,930 | 0,749   | 77/134  |         |          |
|              | coel.(-)     | AL     | 17,173 | 0,341   | 207/218 | 91,36   | < 0.0001 |
|              |              | BD     | 32,862 | 0,399   | 213/231 |         |          |
| Wild-type N2 | AL           | 17,638 | 0,527  | 118/126 | -16,01  | < 0.001 |          |
| coel.(-)     |              | 14,815 | 0,440  | 107/110 |         |         |          |
| Wild-type N2 |              | BD     | 25,017 | 0,569   |         |         | 95/116   |
| coel.(-)     | 28,066       |        | 0,646  | 89/107  | 12,19   | < 0.001 |          |

|                                                  |                                                  |        |        |         |         |        |          |
|--------------------------------------------------|--------------------------------------------------|--------|--------|---------|---------|--------|----------|
| Figure 7 B                                       | coel.(-)                                         | AL     | 14,815 | 0,440   | 107/110 | 89,44  | < 0.0001 |
|                                                  |                                                  | BD     | 28,066 | 0,646   | 89/107  |        |          |
|                                                  | coel.(-); <i>lipI-5(ok3581)</i>                  | AL     | 12,676 | 0,449   | 107/121 | 154,80 | < 0.0001 |
|                                                  |                                                  | BD     | 32,299 | 0,528   | 108/134 |        |          |
|                                                  | coel.(-); <i>lipI-5(ok3581)</i>                  | AL     | 15,266 | 0,522   | 116/123 | 106,20 | < 0.0001 |
|                                                  |                                                  | BD     | 31,479 | 0,701   | 103/138 |        |          |
|                                                  | coel.(-); <i>lipI-5(ok3581)</i>                  | AL     | 17,335 | 0,536   | 119/130 | 80,65  | < 0.0001 |
|                                                  |                                                  | BD     | 31,315 | 0,828   | 90/147  |        |          |
|                                                  | coel.(-); <i>lipI-5(ok3581)</i>                  | AL     | 17,232 | 0,387   | 171/178 | 87,73  | < 0.0001 |
|                                                  |                                                  | BD     | 32,349 | 0,480   | 160/171 |        |          |
| coel.(-)                                         | AL                                               | 14,815 | 0,440  | 107/110 | 3,04    | 0.185  |          |
| coel.(-); <i>lipI-5(ok3581)</i>                  |                                                  | 15,266 | 0,522  | 116/123 |         |        |          |
| coel.(-)                                         | BD                                               | 28,066 | 0,646  | 89/107  | 12,16   | < 0.05 |          |
| coel.(-); <i>lipI-5(ok3581)</i>                  |                                                  | 31,479 | 0,701  | 103/138 |         |        |          |
| Figure 7 D                                       | coel.(-)                                         | AL     | 14,815 | 0,440   | 107/110 | 89,44  | < 0.0001 |
|                                                  |                                                  | BD     | 28,066 | 0,646   | 89/107  |        |          |
|                                                  | coel.(-); <i>oe lipI-5 (endogenous promoter)</i> | AL     | 14,543 | 0,666   | 89/103  | 92,32  | < 0.0001 |
|                                                  |                                                  | BD     | 27,969 | 0,564   | 124/143 |        |          |
|                                                  | coel.(-); <i>oe lipI-5 (endogenous promoter)</i> | AL     | 15,589 | 0,479   | 123/131 | 75,37  | < 0.0001 |
|                                                  |                                                  | BD     | 27,339 | 0,679   | 72/115  |        |          |
|                                                  | coel.(-); <i>oe lipI-5 (endogenous promoter)</i> | AL     | 15,436 | 0,444   | 122/123 | 95,45  | < 0.0001 |
|                                                  |                                                  | BD     | 30,170 | 0,440   | 101/155 |        |          |
| coel.(-)                                         | AL                                               | 14,815 | 0,440  | 107/110 | -1,84   | 0.234  |          |
| coel.(-); <i>oe lipI-5 (endogenous promoter)</i> |                                                  | 14,543 | 0,666  | 89/103  |         |        |          |
| coel.(-)                                         | BD                                               | 28,066 | 0,646  | 89/107  | -0,35   | 0.309  |          |
| coel.(-); <i>oe lipI-5 (endogenous promoter)</i> |                                                  | 27,969 | 0,564  | 124/143 |         |        |          |

|                                                     |                                                     |               |               |                |                |         |          |
|-----------------------------------------------------|-----------------------------------------------------|---------------|---------------|----------------|----------------|---------|----------|
| Figure S5 C                                         | <i>lipl-5(ok3581)</i>                               | AL            | <b>17,987</b> | <b>0,388</b>   | <b>172/183</b> | 85,45   | < 0.0001 |
|                                                     |                                                     | BD            | <b>33,357</b> | <b>0,464</b>   | <b>143/157</b> |         |          |
|                                                     | <i>lipl-5(ok3581)</i>                               | AL            | 23,130        | 0,480          | 193/194        | 32,77   | < 0.0001 |
|                                                     |                                                     | BD            | 30,709        | 0,429          | 155/180        |         |          |
|                                                     | <i>lipl-5(ok3581)</i>                               | AL            | 23,847        | 0,533          | 177/179        | 47,73   | < 0.0001 |
|                                                     |                                                     | BD            | 35,229        | 0,417          | 157/184        |         |          |
|                                                     | <i>lipl-5(ok3581); oe lipl-5 (pges-1 promoteur)</i> | AL            | <b>19,240</b> | <b>0,352</b>   | <b>185/192</b> | 48,43   | < 0.0001 |
|                                                     |                                                     | BD            | <b>28,558</b> | <b>0,522</b>   | <b>142/167</b> |         |          |
|                                                     | <i>lipl-5(ok3581); oe lipl-5 (pges-1 promoteur)</i> | AL            | 24,192        | 0,413          | 205/210        | 19,56   | < 0.0001 |
|                                                     |                                                     | BD            | 28,925        | 0,461          | 165/176        |         |          |
|                                                     | <i>lipl-5(ok3581); oe lipl-5 (pges-1 promoteur)</i> | AL            | 23,643        | 0,521          | 182/183        | 37,41   | < 0.0001 |
|                                                     |                                                     | BD            | 32,487        | 0,562          | 144/189        |         |          |
|                                                     | <i>lipl-5(ok3581)</i>                               | AL            | <b>17,987</b> | <b>0,388</b>   | <b>172/183</b> | 6,97    | < 0.05   |
|                                                     | <i>lipl-5(ok3581); oe lipl-5 (pges-1 promoteur)</i> |               | <b>19,240</b> | <b>0,352</b>   | <b>185/192</b> |         |          |
| <i>lipl-5(ok3581)</i>                               | BD                                                  | <b>33,357</b> | <b>0,464</b>  | <b>143/157</b> | -14,39         | < 0.001 |          |
| <i>lipl-5(ok3581); oe lipl-5 (pges-1 promoteur)</i> |                                                     | <b>28,558</b> | <b>0,522</b>  | <b>142/167</b> |                |         |          |

**Table S2: Lifespan data, Related to Figures 1, 4, 6, 7, 8 and S5**

Lifespan data corresponding to lifespan curves shown in the figures appear in bold in the table.

|                                             | Forward                                                                                                                                        | Reverse                                                                                                                    |
|---------------------------------------------|------------------------------------------------------------------------------------------------------------------------------------------------|----------------------------------------------------------------------------------------------------------------------------|
| Plasmid pAB01 construction                  | Sall/lipl-5 F: 5'-CTGGTCGACATGTGGC<br>GGTTTGCCGTTTTTC-3'                                                                                       | lipl-5/KpnI R: 5'-GTGGTACCTTTCCCAAATAATCGT<br>CAG TGCACAGC-3'                                                              |
| Plasmid pAB02 construction                  | lipl-5p/lipl-5 gibson F: 5'-CAC AAC<br>GAT GGA TAC GCT AAC AAC TTG<br>GAA ATG AAA TAA GCT TCT AAA<br>ACA ATT ATT TTC AGA CGA TAC<br>TTG GTC-3' | lipl-5p/lipl-5 gibson R: 5'-GAT GAC<br>CTC CTC GCC CTT GCT CAC CAT<br>TAC CGG TAC CGA TTT TCC CAA<br>ATA ATC GTC AGT GC-3' |
| Plasmid pAB03 construction:<br>primers PCR1 | F1 (Plasmid+Pcc1): 5'-CGC TAA<br>CAA CTT GGA AAT GAA ATA AGC<br>TTG TTG ACA CGC AGT TTC CCT-<br>3'                                             | R1F2 (Pcc1+lipl-5): 5'-AAC GGC<br>AAA CCG CCA CAT ATT GTG AGC<br>CCA ATG AAG TAA AAT TTC-3'                                |
| Plasmid pAB03 construction:<br>primers PCR2 | R1F2 (Pcc1+lipl-5): 5'-GAA ATT TTA<br>CTT CAT TGG GCT CAC AAT ATG<br>TGG CGG TTT GCC GTT-3'                                                    | R2 (lipl-5+Plasmid): 5'-CCC TTG<br>CTC ACC ATT ACC GGT ACC GAT<br>TTT CCC AAA TAA TCG TCA GTG<br>CAC-3'                    |
| RT-qPCR primer PMP-3                        | 5'-GTT CCC GTG TTC ATC ACT<br>CAT-3'                                                                                                           | 5'-ACA CCG TCC AGA AGC TGT<br>AGA-3'                                                                                       |
| RT-qPCR primer CDC-42                       | 5'-CTG CTG GAC AGG AAG ATT<br>ACG-3'                                                                                                           | 5'-CTC GGA CAT TCT CGA ATG<br>AAG-3'                                                                                       |
| RT-qPCR primer ACT-1                        | 5'-GCT GGA CGT GAT CTT ACT<br>GAT TAC C-3'                                                                                                     | 5'-GTA GCA GAG CTT CTC CTT<br>GAT GTC-3'                                                                                   |
| RT-qPCR primer LILP-1                       | 5'-CGG TTT GCG CTG GAC TTA-3'                                                                                                                  | 5'-GAA CAC GAG TTG CGT TAA-3'                                                                                              |
| RT-qPCR primer LIPL-2                       | 5'-TGG ATG CAG ATG GTT CGC<br>AA-3'                                                                                                            | 5'-GCC CTT GAT GGC TCC GAA<br>AT-3'                                                                                        |
| RT-qPCR primer LIPL-3                       | 5'-GCT CGT GAT TCT TGC GGT<br>TC-3'                                                                                                            | 5'-CGG ATA ACC CCA TCG CTC<br>AA-3'                                                                                        |
| RT-qPCR primer LIPL-4                       | 5'-GAA ACG TTG TTC GCG CAG<br>TT-3'                                                                                                            | 5'-AAC TTG GCT GGC TGC ATT<br>TG-3'                                                                                        |
| RT-qPCR primer LIPL-5                       | 5'-ACT GGG GAA CCA AGA CGA<br>AC-3'                                                                                                            | 5'-TAT CAG CCA ACC AAT CGG<br>CA-3'                                                                                        |

**Table S3: Oligonucleotide information, Related to Figures 2, 3, 4, 5, 6, 7, S3 and S7.**
